# Supplementary material for: Microglial Activation Promotes Cell Survival in Organotypic Cultures of Postnatal Mouse Retinal Explants
Source: PubMed Central journal article supplement (PMC4529135; doi:10.1371/journal.pone.0135238), 2015-08-07

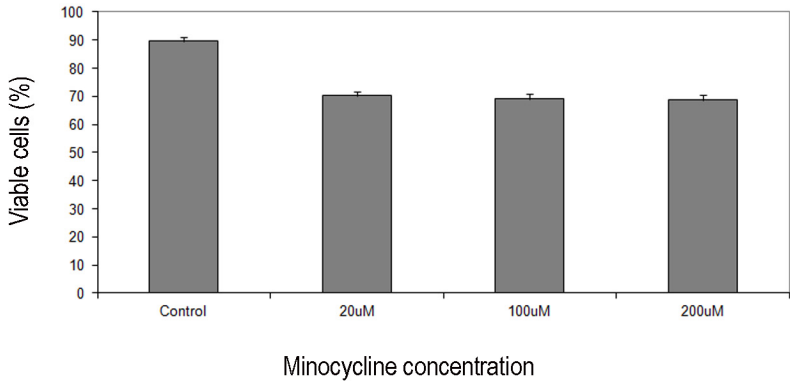

Supplement: pone.0135238.s002.pdf [file pone.0135238.s002.pdf]
